# Supplementary material
Source: PubMed Central journal article supplement (PMC5980120)
Supplement: IMM-154-253-s001.pdf [file IMM-154-253-s001.pdf]

**SUPPLEMENTARY TABLE S1.** Influence of ever-positive alemtuzumab-specific binding and neutralizing antibodies on alemtuzumab-related adverse events

| System                     | Cycle | Always Ab Negative |            | Ever Bab+/Nab Negative |            | Ever Bab/NAb Positive |             |
|----------------------------|-------|--------------------|------------|------------------------|------------|-----------------------|-------------|
|                            |       | N                  | N-AE (%)   | N                      | N-AE (%)   | N                     | N-AE (%)    |
| Cardiac Disorders          | O     | 49                 | 7 (14.3%)  | 22                     | 5 (22.7%)  | 305                   | 43 (14.1%)  |
|                            | C1    | 92                 | 12 (13.0%) | 68                     | 7(10.3%)   | 216                   | 25 (11.6%)  |
|                            | C2    | 51                 | 4 (7.8%)   | 18                     | 1 (5.8%)   | 300                   | 22 (7.3%)   |
| Endocrine Disorders        | O     | 49                 | 0 (0%)     | 22                     | 0(0%)      | 305                   | 3 (1.0%)    |
| Gastrointestinal Disorders | O     | 49                 | 13 (26.5%) | 22                     | 3 (13.6%)  | 305                   | 82 (26.9%)  |
|                            | C1    | 92                 | 17 (18.5%) | 68                     | 17 (25.9%) | 216                   | 39 (18.1%)  |
|                            | C2    | 51                 | 6 (11.8%)  | 18                     | 2 (11.1%)  | 300                   | 44 (14.7%)  |
| Administration site Issues | O     | 49                 | 26 (53.1%) | 22                     | 13 (59.1%) | 305                   | 164 (53.8%) |
|                            | C1    | 92                 | 36 (39.1%) | 68                     | 27(39.7%)  | 216                   | 91 (42.1%)  |
|                            | C2    | 51                 | 12 (23.5%) | 18                     | 5 (27.8%)  | 300                   | 92 (30.7%)  |
| Immune System Disorders    | O     | 49                 | 1 (2.0%)   | 22                     | 0 (0.0%)   | 305                   | 7 (2.3%)    |
|                            | C1    | 92                 | 2 (2.2%)   | 68                     | 1 (1.5%)   | 216                   | 5 (2.3%)    |
|                            | C2    | 51                 | 1 (2.0%)   | 18                     | 0 (0.0%)   | 300                   | 1 (1.3%)    |
| Infection & Infestations   | O     | 49                 | 4 (8.2%)   | 22                     | 0 (0.0%)   | 305                   | 20 (6.6%)   |
|                            | C1    | 92                 | 5 (5.4%)   | 68                     | 3 (4.4%)   | 216                   | 11 (5.1%)   |
|                            | C2    | 51                 | 1 (2.0%)   | 18                     | 0 (0.0%)   | 300                   | 5 (1.7%)    |
| Metabolism Disorder        | O     | 49                 | 0 (0.0%)   | 22                     | 0 (0.0%)   | 305                   | 2 (0.7%)    |
|                            | C1    | 92                 | 0 (0.0%)   | 68                     | 1 (1.5%)   | 216                   | 1 (0.5%)    |
|                            | C2    | 51                 |            | 18                     |            | 300                   |             |
| Muscular Skeletal Disorder | O     | 49                 | 6 (12.2%)  | 22                     | 4 (18.4%)  | 305                   | 60 (19.7%)  |
|                            | C1    | 92                 | 7 (7.6%)   | 68                     | 10 (14.7%) | 216                   | 34 (15.7%)  |
|                            | C2    | 51                 | 4 (7.8%)   | 18                     | 3 (16.7%)  | 300                   | 26 (8.7%)   |
| Nervous System Disorders   | O     | 49                 | 26 (53.1%) | 22                     | 6 (27.3%)  | 305                   | 149 (48.9%) |
|                            | C1    | 92                 | 30 (32.6%) | 68                     | 33(48.5%)  | 216                   | 93 (43.1%)  |
|                            | C2    | 51                 | 16 (31.4%) | 18                     | 3 (16.7%)  | 300                   | 96 (32.0%)  |
| Psychiatric Disorders      | O     | 49                 | 5 (10.2%)  | 22                     | 3 (13.6%)  | 305                   | 40 (13.1%)  |
|                            | C1    | 92                 | 6 (6.5%)   | 68                     | 7 (10.3%)  | 216                   | 18 (8.3%)   |
|                            | C2    | 51                 | 1 (2.0%)   | 18                     | 2(11.1%)   | 300                   | 19 (6.3%)   |
| Renal Disorders            | O     | 49                 | 0 (0.0%)   | 22                     | 0 (0.0%)   | 305                   | 1 (0.3%)    |
| Reproductive Disorders     | O     | 49                 | 1 (2.0%)   | 22                     | 0 (0.0%)   | 305                   | 2 (0.7%)    |
|                            | C1    | 92                 | 1 (1.1%)   | 68                     | 0 (0.0%)   | 216                   | 2 (0.9%)    |
|                            | C2    | 51                 | 0 (0.0%)   | 18                     | 0 (0.0%)   | 300                   | 1 (0.3%)    |
| Respiratory Disorders      | O     | 49                 | 7 (14.3%)  | 22                     | 4 (16.2%)  | 305                   | 54 (17.7%)  |
|                            | C1    | 92                 | 11 (12.0%) | 68                     | 11 (16.2%) | 216                   | 30 (13.9%)  |
|                            | C2    | 51                 | 2 (3.9%)   | 18                     | 2 (11.1%)  | 300                   | 20 (6.7%)   |
| Skin Disorders             | O     | 49                 | 29 (59.2%) | 22                     | 15 (68.2%) | 305                   | 205 (67.2%) |
|                            | C1    | 92                 | 50 (54.3%) | 68                     | 49 (72.1%) | 216                   | 140 (64.8%) |
|                            | C2    | 51                 | 13 (25.5%) | 18                     | 5 (27.8%)  | 300                   | 81 (27.0%)  |
| Vascular Disorders         | O     | 49                 | 8 (16.3%)  | 22                     | 3 (13.6%)  | 305                   | 59 (19.3%)  |
|                            | C1    | 92                 | 8 (8.7%)   | 68                     | 11 (16.2%) | 216                   | 33 (15.3%)  |
|                            | C2    | 51                 | 5 (9.8%)   | 18                     | 0 (0/0%)   | 300                   | 23 (7.7%)   |

The adverse events were assessed overall (O) with the 2 year trial or the year following the first cycle (C1) or the year following the second cycle (C2). The results show the total number (N) within the no alemtuzumab-specific antibodies, ever binding antibody (Bab) positive always neutralizing antibody (Nab) negative or ever Nab and Bab positive groups and the number showing and adverse event (N-AE).

**SUPPLEMENTARY FIGURE S1.** *Blunted lymphocyte depleting response in a person with MS who received multiple alemtuzumab infusion cycles.*

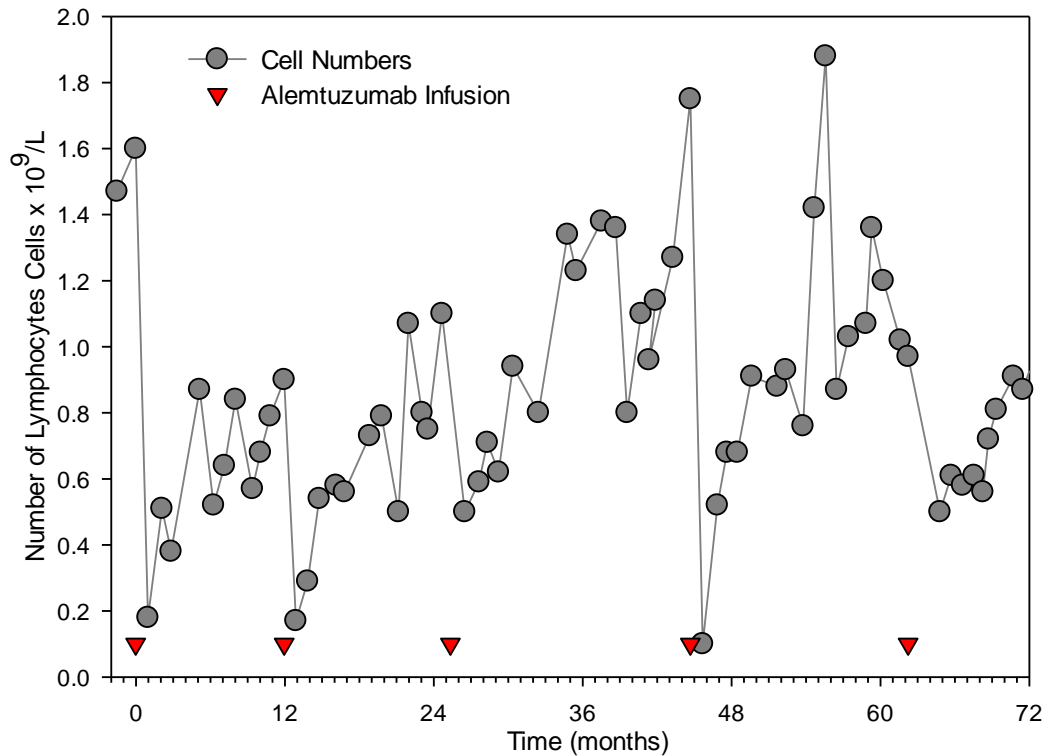

An individual who was a participant in the MS-CARE-1 trial and extension programme received multiple treatment cycles due to MS disease activity. Regular lymphocyte levels were assessed. A third cycle was administered due to MRI activity, but lymphocyte depletion was modest. The patient had a subsequent clinical relapse at (16 months), which triggered a fourth cycle of treatment. Ongoing MRI activity subsequently triggered a fifth cycle, which resulted in limited lymphocyte depletion. Following specific requests, the manufacturer confirmed this individual had binding and neutralizing antibodies with titres that were boosted after each treatment cycle. The robust depletion by the fourth cycle could reflect the increased time interval between cycles, allowing elimination of neutralizing antibodies.

**SUPPLEMENTARY FIGURE S2**

Lymphocyte count profile on people with MS treated with alemtuzumab treated with alemtuzumab in the post-marketing setting.

**(A)**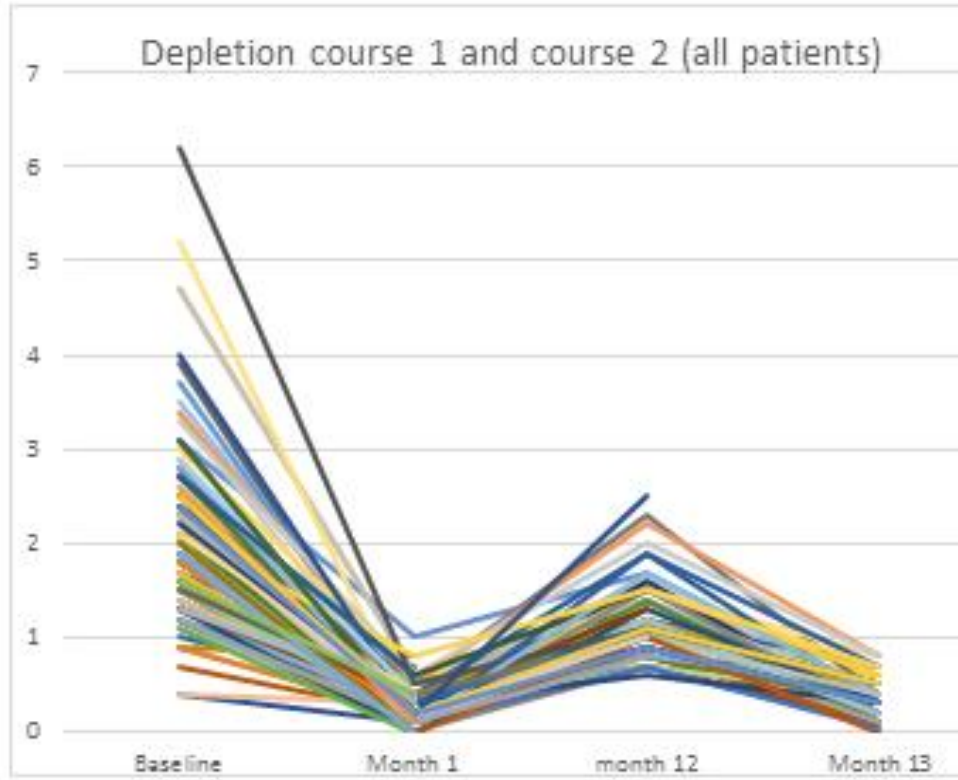**(B)**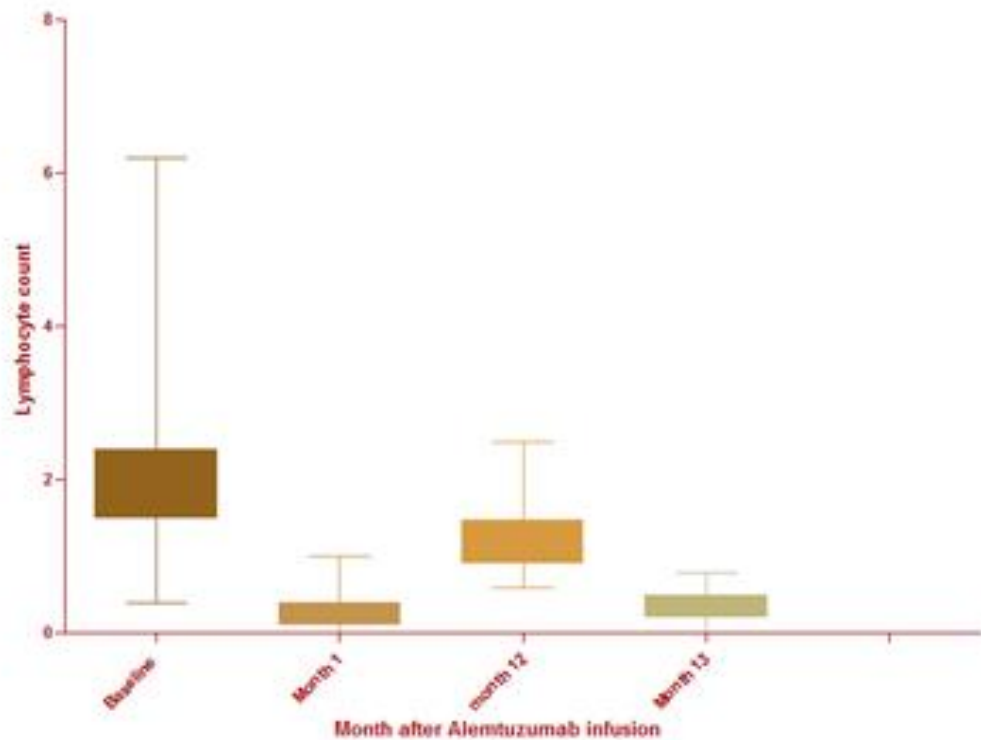

(A) Absolute lymphocyte counts and (B) a box (25-50% quartile) and whisker plot (25-75% quartile) of people treated with alemtuzumab at the Royal London Hospital in the post-marketing setting (n=126). 8
